# Supplementary material
Source: PubMed Central journal article supplement (PMC4286316)
Supplement: NIHMS648004-supplement-Supplement__Technical_Appendix.pdf [file NIHMS648004-supplement-Supplement__Technical_Appendix.pdf]

**Technical Appendix:**

**Supplemental Table S1: Codes Used for the Definition of Study Outcomes**

| <b>Anemia Treatment</b>           | <b>Procedure Codes</b>                                                                           |
|-----------------------------------|--------------------------------------------------------------------------------------------------|
| Erythropoiesis-stimulating agents | Q0136, J0885, Q4055, Q4081, J0886, Q0137, J0880, J0881, Q4054, J0882                             |
| Intravenous iron products         | J1750, J1760, J1770, J1780, J1751, J1752, J2915, J2916, S0098, W0231, J1755, Q0138, Q0139, J3490 |
| Blood Transfusions                | V37, P9903, P9904, P9010, P9011, P9016, P9021, P9022, P9038, P9039, P9040, 36430                 |

**Supplemental Table S2: Prevalence Ratios of Pre-ESRD Use of any Erythropoiesis-Stimulating Agent**

|                         |                                                       | Complete Case<br>(N=426,953)                          |                                                       |                                                       | Multiple<br>Imputation<br>(N=466,803)                 |                                                       |
|-------------------------|-------------------------------------------------------|-------------------------------------------------------|-------------------------------------------------------|-------------------------------------------------------|-------------------------------------------------------|-------------------------------------------------------|
|                         | Model 1                                               | Model 2                                               | Model 3                                               | Model 1                                               | Model 2                                               | Model 3                                               |
| 1995                    | 1.0<br>Referent                                       | 1.0<br>Referent                                       | 1.0<br>Referent                                       | 1.0<br>Referent                                       | 1.0<br>Referent                                       | 1.0<br>Referent                                       |
| 1996                    | 1.34<br>(1.21-1.49)                                   | 1.35<br>(1.21-1.49)                                   | 1.35<br>(1.21-1.50)                                   | 1.59<br>(1.45-1.74)                                   | 1.59<br>(1.45-1.74)                                   | 1.58<br>(1.45-1.73)                                   |
| 1997                    | 1.66<br>(1.50-1.84)                                   | 1.66<br>(1.51-1.84)                                   | 1.68<br>(1.52-1.85)                                   | 1.91<br>(1.75-2.09)                                   | 1.92<br>(1.76-2.09)                                   | 1.92<br>(1.76-2.09)                                   |
| 1998                    | 2.01<br>(1.82-2.21)                                   | 2.01<br>(1.82-2.21)                                   | 2.04<br>(1.85-2.24)                                   | 2.31<br>(2.12-2.51)                                   | 2.31<br>(2.12-2.51)                                   | 2.33<br>(2.14-2.53)                                   |
| 1999                    | 2.35<br>(2.14-2.58)                                   | 2.35<br>(2.14-2.58)                                   | 2.40<br>(2.18-2.63)                                   | 2.63<br>(2.42-2.85)                                   | 2.63<br>(2.42-2.85)                                   | 2.66<br>(2.45-2.89)                                   |
| 2000                    | 2.85<br>(2.60-3.13)                                   | 2.84<br>(2.60-3.12)                                   | 2.93<br>(2.67-3.21)                                   | 3.18<br>(2.94-3.45)                                   | 3.19<br>(2.94-3.45)                                   | 3.25<br>(3.00-3.52)                                   |
| 2001                    | 4.55<br>(4.16-4.97)                                   | 4.54<br>(4.15-4.96)                                   | 4.68<br>(4.29-5.12)                                   | 5.10<br>(4.72-5.51)                                   | 5.10<br>(4.73-5.51)                                   | 5.22<br>(4.83-5.64)                                   |
| 2002                    | 5.27<br>(4.83-5.75)                                   | 5.27<br>(4.82-5.75)                                   | 5.46<br>(5.00-5.96)                                   | 5.92<br>(5.49-6.93)                                   | 5.94<br>(5.50-6.41)                                   | 6.10<br>(5.65-6.58)                                   |
| 2003                    | 6.77<br>(6.21-7.39)                                   | 6.78<br>(6.22-7.40)                                   | 7.06<br>(6.47-7.70)                                   | 7.56<br>(7.01-8.15)                                   | 7.60<br>(7.04-8.19)                                   | 7.83<br>(7.26-8.44)                                   |
| 2004                    | 9.46<br>(8.68-10.31)                                  | 6.46<br>(8.68-10.31)                                  | 9.87<br>(9.06-10.76)                                  | 10.63<br>(9.87-11.45)                                 | 10.76<br>(9.90-11.49)                                 | 11.01<br>(10.23-10.23)                                |
| 2005                    | 10.97<br>(10.07-11.95)                                | 10.96<br>(10.06-11.94)                                | 11.49<br>(10.55-12.52)                                | 12.29<br>(11.42-13.23)                                | 12.33<br>(11.45-13.28)                                | 12.79<br>(11.88-13.77)                                |
| 2006                    | 11.36<br>(10.43-12.38)                                | 11.34<br>(10.41-12.36)                                | 11.95<br>(10.97-13.02)                                | 12.75<br>(11.84-13.73)                                | 12.78<br>(11.87-13.76)                                | 13.31<br>(12.36-14.33)                                |
| 2007                    | 11.46<br>(10.52-12.48)<br><i>1.0<br/>Referent</i>     | 11.45<br>(10.51-12.47)<br><i>1.0<br/>Referent</i>     | 12.12<br>(11.12-13.20)<br><i>1.0<br/>Referent</i>     | 12.85<br>(11.94-13.84)<br><i>1.0<br/>Referent</i>     | 12.90<br>(11.98-13.89)<br><i>1.0<br/>Referent</i>     | 13.50<br>(12.53-14.53)<br><i>1.0<br/>Referent</i>     |
| 2008<br><i>vs. 2007</i> | 10.99<br>(10.09-11.98)<br><i>0.96<br/>(0.94-0.98)</i> | 10.98<br>(10.08-11.97)<br><i>0.96<br/>(0.94-0.98)</i> | 11.66<br>(10.70-12.71)<br><i>0.96<br/>(0.94-0.98)</i> | 12.30<br>(11.42-13.24)<br><i>0.96<br/>(0.94-0.98)</i> | 12.34<br>(11.46-13.29)<br><i>0.96<br/>(0.94-0.98)</i> | 12.95<br>(12.03-13.95)<br><i>0.96<br/>(0.94-0.98)</i> |
| 2009<br><i>vs. 2007</i> | 10.40<br>(9.54-11.33)<br><i>0.91<br/>(0.89-0.93)</i>  | 10.40<br>(9.54-11.33)<br><i>0.91<br/>(0.89-0.93)</i>  | 11.08<br>(10.16-12.07)<br><i>0.91<br/>(0.90-0.93)</i> | 11.63<br>(10.80-12.52)<br><i>0.91<br/>(0.98-0.92)</i> | 11.68<br>(10.85-12.58)<br><i>0.91<br/>(0.89-0.92)</i> | 12.29<br>(11.41-13.24)<br><i>0.91<br/>(0.89-0.93)</i> |
| 2010<br><i>vs. 2007</i> | 9.85<br>(9.04-10.74)<br><i>0.86<br/>(0.84-0.88)</i>   | 9.86<br>(9.04-10.74)<br><i>0.86<br/>(0.84-0.88)</i>   | 10.51<br>(9.65-11.46)<br><i>0.87<br/>(0.85-0.89)</i>  | 11.03<br>(10.24-11.88)<br><i>0.86<br/>(0.84-0.88)</i> | 11.09<br>(10.29-11.94)<br><i>0.86<br/>(0.84-0.88)</i> | 11.68<br>(10.84-12.58)<br><i>0.87<br/>(0.85-0.88)</i> |

Model 1 – unadjusted; Model 2 – adjusted for age, sex, race, Medicaid eligibility; Model 3 – additionally adjusted for diabetes (reported comorbidity), estimated glomerular filtration rate, and body mass index. Red numbers indicate results from an otherwise identical model on the same data where 2007 instead of 1995 was the referent year. Models additionally adjusting for hypertension, coronary artery disease, heart failure, cerebrovascular disease, peripheral artery disease, chronic obstructive pulmonary disease, and cancer yielded very similar estimated to Model 3 and are not shown.

**Supplemental Table S3: Prevalence Ratios of Pre-ESRD Intravenous Iron Administration**

|      |                      | Complete Case<br>(N=426,953) |                      |                      | Multiple<br>Imputation<br>(N=466,803) |                      |
|------|----------------------|------------------------------|----------------------|----------------------|---------------------------------------|----------------------|
|      | Model 1              | Model 2                      | Model 3              | Model 1              | Model 2                               | Model 3              |
| 1995 | 1.0<br>Referent      | 1.0<br>Referent              | 1.0<br>Referent      | 1.0<br>Referent      | 1.0<br>Referent                       | 1.0<br>Referent      |
| 1996 | 1.21<br>(1.02-1.44)  | 1.21<br>(1.01-1.44)          | 1.21<br>(1.01-1.44)  | 1.34<br>(1.15-1.56)  | 1.35<br>(1.16-1.57)                   | 1.35<br>(1.16-1.57)  |
| 1997 | 1.29<br>(1.09-1.53)  | 1.29<br>(1.09-1.53)          | 1.28<br>(1.08-1.52)  | 1.42<br>(1.22-1.64)  | 1.42<br>(1.23-1.65)                   | 1.41<br>(1.22-1.64)  |
| 1998 | 1.23<br>(1.03-1.45)  | 1.23<br>(1.04-1.46)          | 1.21<br>(1.02-1.43)  | 1.35<br>(1.16-1.57)  | 1.36<br>(1.17-1.58)                   | 1.34<br>(1.15-1.55)  |
| 1999 | 1.51<br>(1.28-1.78)  | 1.52<br>(1.29-1.79)          | 1.48<br>(1.26-1.74)  | 1.65<br>(1.43-1.90)  | 1.66<br>(1.44-1.91)                   | 1.62<br>(1.41-1.87)  |
| 2000 | 1.51<br>(1.28-1.78)  | 1.52<br>(1.29-1.79)          | 1.47<br>(1.25-1.73)  | 1.62<br>(1.40-1.86)  | 1.63<br>(1.41-1.88)                   | 1.58<br>(1.37-1.82)  |
| 2001 | 2.02<br>(1.73-2.36)  | 2.04<br>(1.74-2.38)          | 1.96<br>(1.67-2.29)  | 2.17<br>(1.90-2.49)  | 2.20<br>(1.92-2.51)                   | 2.11<br>(1.84-2.42)  |
| 2002 | 2.47<br>(2.12-2.87)  | 2.50<br>(2.14-2.91)          | 2.39<br>(2.05-2.78)  | 2.65<br>(2.32-3.03)  | 2.69<br>(2.36-3.07)                   | 2.58<br>(2.26-2.94)  |
| 2003 | 3.22<br>(2.77-3.74)  | 3.26<br>(2.81-3.79)          | 3.11<br>(2.68-3.61)  | 3.45<br>(3.04-3.92)  | 3.51<br>(3.09-3.99)                   | 3.35<br>(2.94-3.80)  |
| 2004 | 3.89<br>(3.36-4.50)  | 3.94<br>(3.40-4.56)          | 3.73<br>(3.22-4.32)  | 4.21<br>(3.71-4.77)  | 4.28<br>(3.77-4.85)                   | 4.06<br>(3.58-4.60)  |
| 2005 | 4.93<br>(4.27-5.71)  | 5.01<br>(4.33-5.79)          | 4.72<br>(4.08-5.47)  | 5.38<br>(4.76-6.09)  | 5.48<br>(4.84-6.20)                   | 5.17<br>(4.57-5.86)  |
| 2006 | 6.28<br>(5.44-7.25)  | 6.37<br>(5.51-7.35)          | 5.99<br>(5.18-6.92)  | 6.79<br>(6.01-7.68)  | 6.91<br>(6.12-7.82)                   | 6.50<br>(5.75-7.35)  |
| 2007 | 6.97<br>(6.04-8.05)  | 7.09<br>(6.14-8.18)          | 6.63<br>(5.74-7.66)  | 7.58<br>(6.71-8.57)  | 7.74<br>(6.85-8.75)                   | 7.24<br>(6.40-8.18)  |
| 2008 | 7.72<br>(6.69-8.91)  | 7.84<br>(6.79-9.05)          | 7.32<br>(6.33-8.45)  | 8.37<br>(7.41-9.46)  | 8.54<br>(7.56-9.65)                   | 7.97<br>(7.05-9.01)  |
| 2009 | 8.12<br>(7.04-9.37)  | 8.28<br>(7.17-9.55)          | 7.70<br>(6.67-8.90)  | 8.78<br>(7.77-9.91)  | 8.98<br>(7.95-10.15)                  | 8.36<br>(7.40-9.44)  |
| 2010 | 9.20<br>(7.97-10.61) | 9.38<br>(8.13-10.82)         | 8.71<br>(7.55-10.06) | 9.93<br>(8.80-11.21) | 10.17<br>(9.01-11.48)                 | 9.44<br>(8.36-10.66) |

Model 1 – unadjusted; Model 2 – adjusted for age, sex, race, Medicaid eligibility; Model 3 – additionally adjusted for diabetes (reported comorbidity), estimated glomerular filtration rate, and body mass index. Models additionally adjusting for hypertension, coronary artery disease, heart failure, cerebrovascular disease, peripheral artery disease, chronic obstructive pulmonary disease, and cancer yielded very similar estimated to Model 3 and are not shown.

**Supplemental Table S4: Prevalence Ratios of Pre-ESRD Receipt of Any Blood Transfusion**

|      |                     | Complete Case<br>(N=426,953) |                     |                     | Multiple<br>Imputation<br>(N=466,803) |                     |
|------|---------------------|------------------------------|---------------------|---------------------|---------------------------------------|---------------------|
|      | Model 1             | Model 2                      | Model 3             | Model 1             | Model 2                               | Model 3             |
| 1995 | 1.0<br>Referent     | 1.0<br>Referent              | 1.0<br>Referent     | 1.0<br>Referent     | 1.0<br>Referent                       | 1.0<br>Referent     |
| 1996 | 1.04<br>(1.00-1.08) | 1.04<br>(1.00-1.08)          | 1.04<br>(1.00-1.09) | 1.05<br>(1.01-1.09) | 1.05<br>(1.02-1.09)                   | 1.05<br>(1.02-1.09) |
| 1997 | 1.09<br>(1.05-1.14) | 1.10<br>(1.05-1.14)          | 1.10<br>(1.05-1.14) | 1.12<br>(1.08-1.16) | 1.12<br>(1.08-1.16)                   | 1.11<br>(1.08-1.15) |
| 1998 | 1.16<br>(1.12-1.21) | 1.16<br>(1.12-1.21)          | 1.16<br>(1.12-1.21) | 1.19<br>(1.16-1.23) | 1.19<br>(1.15-1.23)                   | 1.18<br>(1.14-1.22) |
| 1999 | 1.19<br>(1.14-1.23) | 1.19<br>(1.14-1.23)          | 1.19<br>(1.15-1.24) | 1.22<br>(1.18-1.26) | 1.21<br>(1.18-1.25)                   | 1.21<br>(1.17-1.25) |
| 2000 | 1.25<br>(1.20-1.30) | 1.25<br>(1.20-1.29)          | 1.26<br>(1.21-1.31) | 1.29<br>(1.25-1.33) | 1.28<br>(1.24-1.33)                   | 1.28<br>(1.24-1.32) |
| 2001 | 1.37<br>(1.32-1.42) | 1.37<br>(1.32-1.42)          | 1.38<br>(1.33-1.43) | 1.41<br>(1.36-1.45) | 1.40<br>(1.36-1.45)                   | 1.40<br>(1.36-1.44) |
| 2002 | 1.49<br>(1.44-1.54) | 1.48<br>(1.43-1.54)          | 1.50<br>(1.45-1.55) | 1.53<br>(1.48-1.58) | 1.52<br>(1.48-1.57)                   | 1.52<br>(1.47-1.57) |
| 2003 | 1.52<br>(1.47-1.57) | 1.51<br>(1.46-1.57)          | 1.53<br>(1.48-1.59) | 1.56<br>(1.51-1.60) | 1.55<br>(1.50-1.60)                   | 1.55<br>(1.50-1.60) |
| 2004 | 1.57<br>(1.52-1.63) | 1.57<br>(1.52-1.63)          | 1.59<br>(1.53-1.64) | 1.62<br>(1.57-1.67) | 1.62<br>(1.57-1.67)                   | 1.61<br>(1.57-1.66) |
| 2005 | 1.59<br>(1.54-1.65) | 1.59<br>(1.54-1.65)          | 1.61<br>(1.56-1.67) | 1.64<br>(1.59-1.69) | 1.64<br>(1.59-1.69)                   | 1.64<br>(1.59-1.69) |
| 2006 | 1.61<br>(1.55-1.67) | 1.61<br>(1.55-1.67)          | 1.63<br>(1.58-1.69) | 1.66<br>(1.61-1.71) | 1.66<br>(1.61-1.81)                   | 1.66<br>(1.61-1.71) |
| 2007 | 1.67<br>(1.61-1.73) | 1.67<br>(1.61-1.73)          | 1.70<br>(1.64-1.76) | 1.72<br>(1.67-1.77) | 1.72<br>(1.67-1.78)                   | 1.73<br>(1.68-1.78) |
| 2008 | 1.81<br>(1.75-1.88) | 1.82<br>(1.75-1.88)          | 1.85<br>(1.78-1.91) | 1.87<br>(1.82-1.93) | 1.87<br>(1.82-1.93)                   | 1.88<br>(1.82-1.94) |
| 2009 | 1.86<br>(1.79-1.92) | 1.86<br>(1.80-1.92)          | 1.89<br>(1.83-1.96) | 1.91<br>(1.86-1.97) | 1.92<br>(1.86-1.97)                   | 1.93<br>(1.87-1.98) |
| 2010 | 1.88<br>(1.82-1.95) | 1.89<br>(1.83-1.96)          | 1.93<br>(1.86-1.99) | 1.95<br>(1.90-2.01) | 1.96<br>(1.90-2.02)                   | 1.97<br>(1.91-2.03) |

Model 1 – unadjusted; Model 2 – adjusted for age, sex, race, Medicaid eligibility; Model 3 – additionally adjusted for diabetes (reported comorbidity), estimated glomerular filtration rate, and body mass index. Models additionally adjusting for hypertension, coronary artery disease, heart failure, cerebrovascular disease, peripheral artery disease, chronic obstructive pulmonary disease, and cancer yielded very similar estimated to Model 3 and are not shown.

**Supplemental Figure S1: Venn Diagrams of Utilization among Anemia Treatments prior to End-Stage Renal Disease (1995, 2000, 2005, and 2010)**

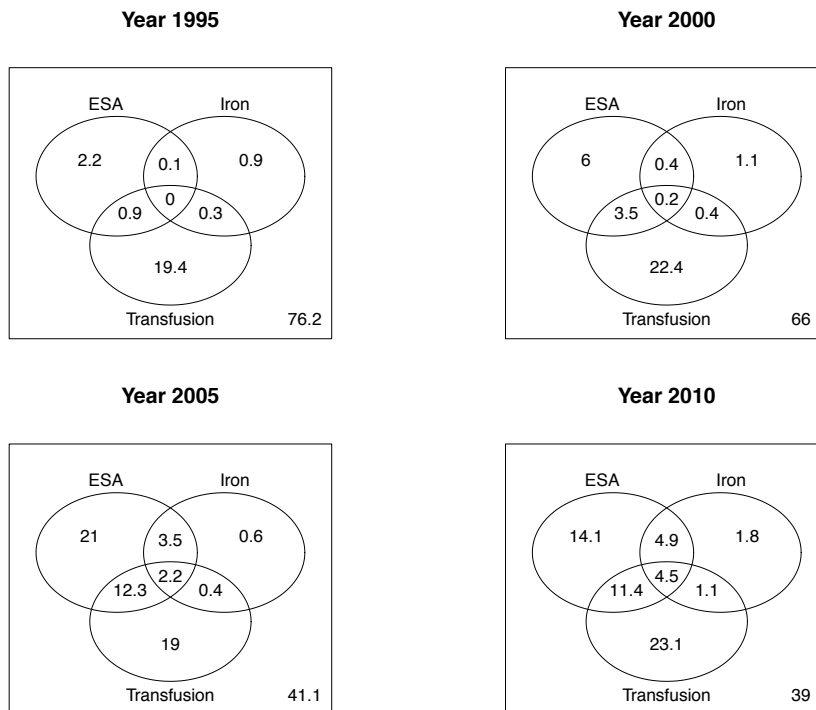

ESA – erythropoiesis-stimulating agents. All numbers correspond to proportion of patients who received the corresponding anemia treatment(s) in the two years prior to reaching end-stage renal disease. The number in the bottom right indicates the proportion of patients who did not receive any of the three treatments.
